# Supplementary material
Source: ML conference proceedings conference paper supplement (https://openaccess.thecvf.com/content/ICCV2023/html/Lee_Weakly_Supervised_Referring_ICCV_2023_paper.html)
Supplement: Supplementary file 1 [file Lee_Weakly_Supervised_Referring_ICCV_2023_supplemental.pdf]

# Appendix for Weakly Supervised Referring Image Segmentation with Intra-Chunk and Inter-Chunk Consistency

Anonymous ICCV submission

Paper ID 5477

## A1. Detailed Experimental Setup

We utilized images with a resolution of  $384 \times 384$  pixels for both training and inference. To input data into the visual Transformer, we used a patch size of 16, resulting in a  $N_w$  of  $24 \times 24$ . We set batch size to 32, learning rate to  $1e-5$ , and  $d$  to 768. We train our model with 5 epochs with adamW optimizer [2]. On the architecture, we follow ALBEF [1]: we use 12-layer visual encoder, 6-layer text encoder, and 6-layer cross-attention transformer. We plan to make our code publicly available upon acceptance.

## A2. Additional Analysis

**Hyper-parameters:** We present the performance using the different values of hyper-parameters. The values of  $\lambda_1$  and  $\lambda_2$  control the influence of  $L_{inter}$  and  $L_{intra}$  respectively (Eq. 2). We first investigate the effectiveness of these hyper-parameters in Table A1. We can see that  $L_{inter}$  and  $L_{intra}$  can produce satisfactory results with a wide range of values of  $\lambda_1$  and  $\lambda_2$ . Next, we show the effectiveness of the values of  $\tau$  (Eq. 4) in Table A2. We can see that  $\tau$  is even less sensitive than  $\lambda_1$  and  $\lambda_2$ . Finally, we analyze the effect of the number of MCG proposals in Section 3.3.2. We used 200 MCG proposals for each image. 100 proposals drop the performance by 0.9%p. No performance change is observed with  $> 200$  proposals.

**Negative Meaning:** As mentioned in Section 4.3 in the main paper, our method does not work properly for the negative terms (e.g., ‘no’, ‘not’). We can partly address this issue with the utilization of box labels. We collect the ‘Negative’ set by selectively collecting the expressions containing one of the following words: ‘no’, ‘not’, and ‘without’. Table A3 compares the results on the ‘Negative’ set with ‘All’ set. Learning with image-text pairs produces 24.3% drop for the ‘Negative’ set, while learning with boxes produces 16.5% drop. Negative meanings can be effectively modeled through explicit localization cues provided by the box. However, learning negative expressions is still a challenging problem. We expect that more sophisticated language modeling is required.

## A3. Additional Examples

We present additional examples of localization maps produced by GroupViT [3], ALBEF [1], and our method.

## References

- [1] Junnan Li, Ramprasaath Selvaraju, Akhilesh Gotmare, Shafiq Joty, Caiming Xiong, and Steven Chu Hong Hoi. Align before fuse: Vision and language representation learning with momentum distillation. *Advances in neural information processing systems*, 34:9694–9705, 2021. 1, 3
- [2] Ilya Loshchilov and Frank Hutter. Decoupled weight decay regularization. *arXiv preprint arXiv:1711.05101*, 2017. 1
- [3] Jiarui Xu, Shalini De Mello, Sifei Liu, Wonmin Byeon, Thomas Breuel, Jan Kautz, and Xiaolong Wang. Groupvit: Semantic segmentation emerges from text supervision. In *Proceedings of the IEEE/CVF Conference on Computer Vision and Pattern Recognition*, pages 18134–18144, 2022. 1, 3

Table A1: Performance with various combinations of values of  $\lambda_1$  and  $\lambda_2$ .

| $\lambda_1$ | $\lambda_2$ | RefCOCO |       |       | RefCOCO+ |       |       | G-Ref |
|-------------|-------------|---------|-------|-------|----------|-------|-------|-------|
|             |             | val     | testA | testB | val      | testA | testB | val   |
| 0           | 0           | 23.12   | 22.79 | 23.42 | 22.44    | 22.07 | 22.51 | 24.18 |
| 0.5         | 0           | 25.49   | 25.16 | 25.93 | 24.36    | 24.17 | 25.06 | 26.32 |
| 0           | 1.5         | 25.29   | 25.89 | 25.01 | 24.67    | 24.93 | 24.64 | 25.37 |
| 0.5         | 1.5         | 26.45   | 26.93 | 26.52 | 25.49    | 25.53 | 25.89 | 26.61 |
| 0.5         | 3           | 26.52   | 27.24 | 26.64 | 25.33    | 25.50 | 25.82 | 26.82 |
| 1           | 3           | 26.19   | 26.92 | 26.26 | 25.68    | 26.11 | 25.94 | 26.97 |
| 1           | 5           | 25.34   | 25.98 | 25.71 | 25.14    | 25.79 | 25.43 | 27.14 |
| 1.5         | 5           | 25.47   | 25.64 | 25.84 | 24.35    | 24.04 | 25.26 | 27.06 |

Table A2: Performance with various values of  $\tau$  on the RefCOCO+ dataset.

| $\tau$ | val   | testA | testB |
|--------|-------|-------|-------|
| 0.1    | 25.81 | 26.63 | 25.64 |
| 0.15   | 25.82 | 26.50 | 25.81 |
| 0.2    | 25.68 | 26.11 | 25.94 |
| 0.25   | 25.44 | 25.79 | 25.85 |
| 0.3    | 25.20 | 25.44 | 25.59 |

Table A3: Performance for the ‘Negative’ and ‘All’ sets on the RefCOCO+ dataset.

| Set                           | val   | testA | testB |
|-------------------------------|-------|-------|-------|
| Supervision: image-text pairs |       |       |       |
| Negative                      | 19.44 | 18.80 | 18.14 |
| All                           | 25.68 | 25.11 | 25.94 |
| Supervision: boxes            |       |       |       |
| Negative                      | 40.21 | 41.56 | 35.96 |
| All                           | 48.19 | 53.01 | 42.83 |

216  
217  
218  
219  
220  
221  
222  
223  
224  
225  
226  
227  
228  
229  
230  
231  
232  
233  
234  
235  
236  
237  
238  
239  
240  
241  
242  
243  
244  
245  
246  
247  
248  
249  
250  
251  
252  
253  
254  
255  
256  
257  
258  
259  
260  
261  
262  
263  
264  
265  
266  
267  
268  
269

270  
271  
272  
273  
274  
275  
276  
277  
278  
279  
280  
281  
282  
283  
284  
285  
286  
287  
288  
289  
290  
291  
292  
293  
294  
295  
296  
297  
298  
299  
300  
301  
302  
303  
304  
305  
306  
307  
308  
309  
310  
311  
312  
313  
314  
315  
316  
317  
318  
319  
320  
321  
322  
323

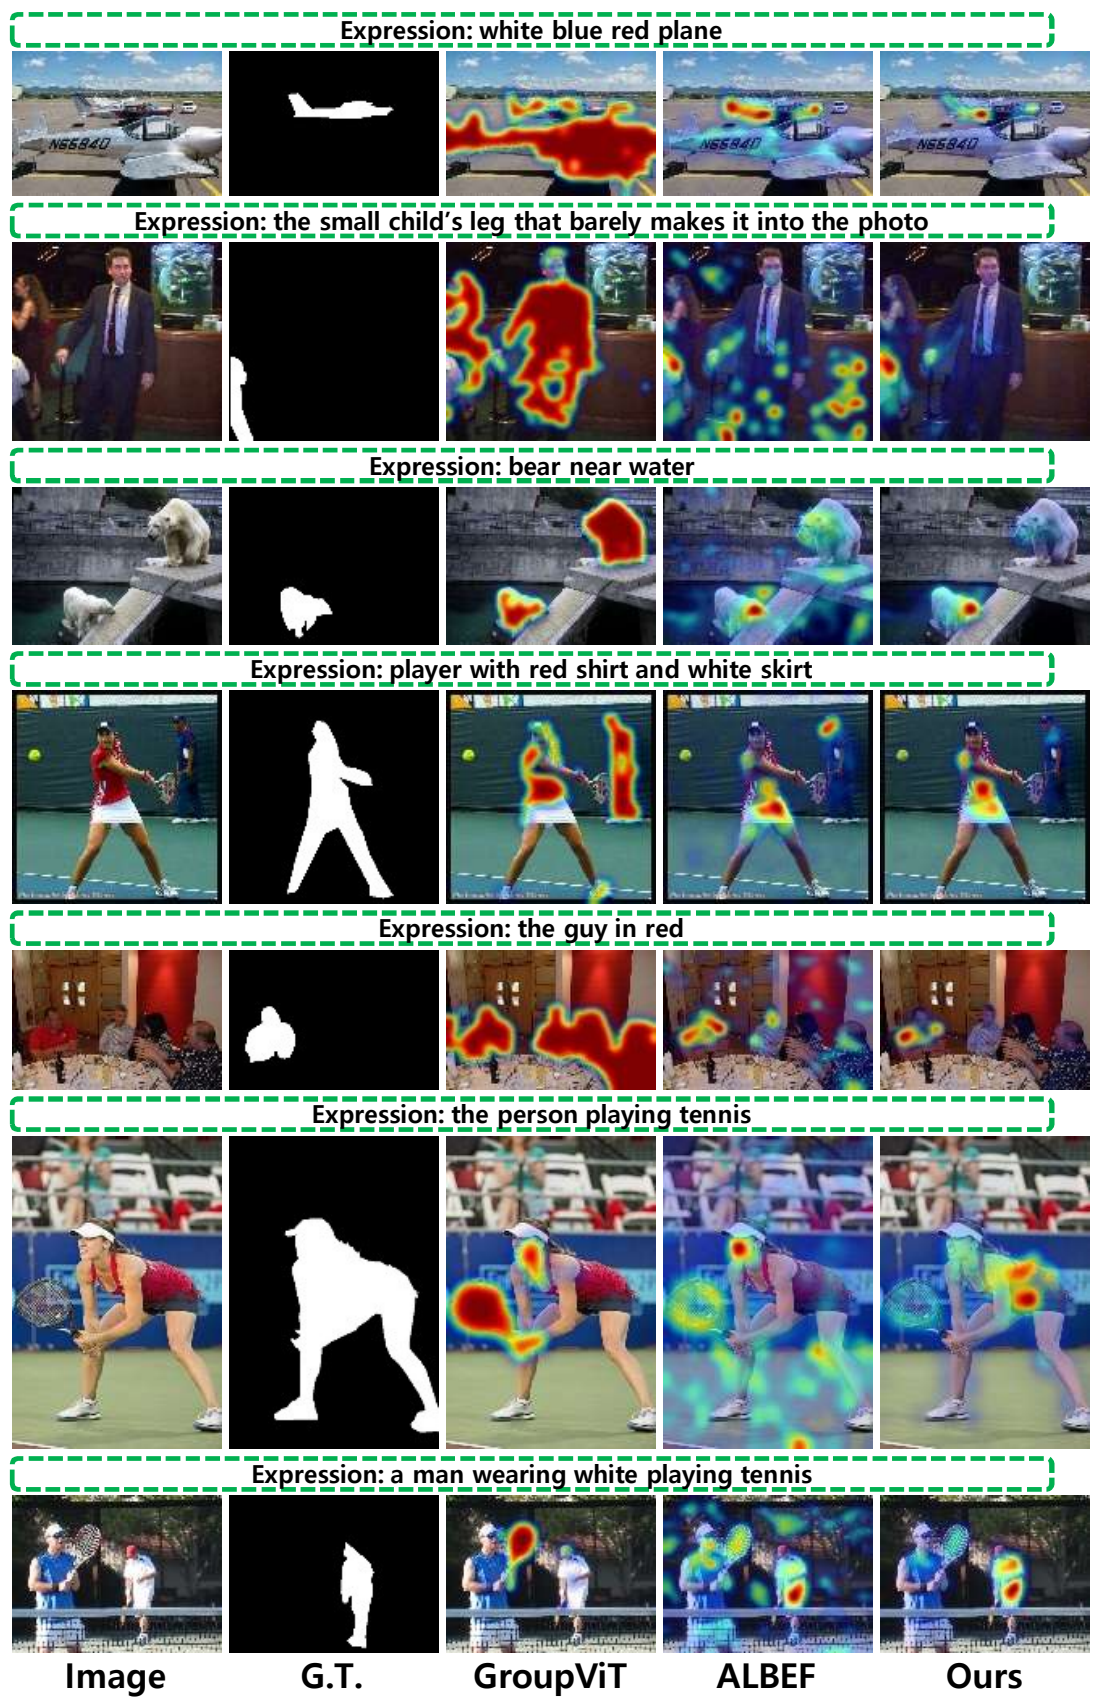

Figure A1: Examples of localization maps obtained by GroupViT [3], our baseline ALBEF [1], and ours method, which are obtained without refinement techniques.
